# Supplementary material
Source: PubMed Central journal article supplement (PMC8594318)
Supplement: NIHMS1750223-supplement-Supplement_1.pdf [file NIHMS1750223-supplement-Supplement_1.pdf]

## Supplemental Tables

**Table 1:** List of antibodies used to measure protein expression:

| Antibody                                    | Product ID | Manufacturer                                |
|---------------------------------------------|------------|---------------------------------------------|
| F4/80                                       | sc-377009  | Santa Cruz Biotechnology (Shanghai, China)  |
| CDH16                                       | sc-393153  | Santa Cruz Biotechnology (Shanghai, China)  |
| Cleaved-caspase 3                           | 9661       | Cell Signaling Technology (Shanghai, China) |
| CCKBR                                       | GTX89402   | GeneTex (Taiwan, China)                     |
| TNF- $\alpha$                               | 17590-1-AP | Proteintech (Wuhan, China)                  |
| IL-6                                        | 66146-1-Ig | Proteintech (Wuhan, China)                  |
| IL-1 $\beta$                                | 31202      | Cell Signaling Technology (Shanghai, China) |
| GAPDH                                       | GTX100118  | GeneTex (Taiwan, China)                     |
| PCNA                                        | GTX100539  | GeneTex (Taiwan, China)                     |
| BD Pharmingen™ PE Rat Anti-Mouse F4/80      | 565410     | BD Biosciences (Shanghai, China)            |
| Alexa Fluor® 647 Rat Anti-CD11b             | 557686     | BD Biosciences (Shanghai, China)            |
| BD Pharmingen™ FITC Rat Anti-CD11b          | 557396     | BD Biosciences (Shanghai, China)            |
| Goat anti-Mouse IgG (FITC)                  | SA00003-1  | Proteintech (Wuhan, China)                  |
| Goat anti-Rabbit IgG (Cy3)                  | SA00009-1  | Proteintech (Wuhan, China)                  |
| Goat anti-Mouse IgG (Cy3)                   | SA00009-2  | Proteintech (Wuhan, China)                  |
| Donkey anti-Goat IgG(Alexa Fluor™ Plus 647) | A32849     | Thermo Fisher Scientific (Shanghai, China)  |
| Donkey anti-Goat IgG (Cy3)                  | SA00009-3  | Proteintech (Wuhan, China)                  |
| Goat anti-Rabbit IR Dye 800                 | 925-32211  | Li-Cor Biosciences ( Lincoln, NE)           |
| Donkey anti-Goat IR Dye 800                 | 925-32214  | Li-Cor Biosciences ( Lincoln, NE)           |
| Goat anti-Mouse IR Dye 800                  | 926-32210  | Li-Cor Biosciences ( Lincoln, NE)           |

**Table 2:** List of primers used to measure the gene expression.

| Gene           | Forward                                 | Reverse                                 |
|----------------|-----------------------------------------|-----------------------------------------|
| CCKBR          | 5'-<br>GGTGGCAGAGTGGAGGAG<br>TAGG-3'    | 5'-<br>GCGG TTCAGCTTGAGCAG<br>ATCC-3'   |
| MCP-1          | 5'-<br>TTTTTGTCAACCAAGCTCAA<br>GAG-3'   | 5'-<br>TTCTGATCTCATTGGTTC<br>CGA-3'     |
| IL-6           | 5'-<br>CTCCCAACAGACCTGTCTAT<br>AC-3'    | 5'-<br>CCATTGCACA ACTCTTTT<br>CTCA-3'   |
| TNF- $\alpha$  | 5'-<br>ATGTCTCAGCCTCTTCTCAT<br>TC-3'    | 5'-<br>GCTTGTCACTCGAATTTT<br>GAGA-3'    |
| IFN- $\gamma$  | 5'-<br>CTTGAAAGACAATCAGGCC<br>ATC-3'    | 5'-<br>CTTGGCAATACTCATGAAT<br>GCA-3'    |
| Mfge8          | 5'-<br>GGACATCTTCACCGAATAC<br>ATCTGC-3' | 5'-<br>TGATACCCGCATCTTCCG<br>CAG-3'     |
| Mertk          | 5'-<br>GGACTGCTTGATGAACTG<br>TA-3'      | 5'-<br>AGCCTCAACACAGAGAA<br>GGTG-3'     |
| CD36           | 5'-<br>TCGGA ACTGTGGGCTCATT<br>G-3'     | 5'-<br>CCTCGGGGTCCTGAGTTA<br>TATTTTC-3' |
| Gas6           | 5'-<br>TCTTCTCACACTGTGCTGTT<br>GCG-3'   | 5'-<br>GGTCAGGCAAGTTCTGAA<br>CACAT-3'   |
| Clqa           | 5'-<br>AAAGGCAATCCAGGCAATA<br>TCA-3'    | 5'-<br>TGGTTCTGGTATGGACTC<br>TCC-3'     |
| Clqb           | 5'-<br>AACGCGAACGAGAACTATG<br>A-3'      | 5'-<br>ACGAGATTACACACACA<br>GGTTG-3'    |
| PPAR- $\alpha$ | 5'-<br>TTTCGGCGAACTATTCGGCT<br>G-3'     | 5'-<br>GGCATTGTTCGGTTCTT<br>CTT-3'      |
| PPAR- $\gamma$ | 5'-<br>CCATCGAGGACATCCAAGA<br>CAACC-3'  | 5'-<br>GGAGCACCTTGGCGAAC<br>AGC-3'      |
| PPAR- $\delta$ | 5'-<br>GACACTGTGGCAGGCAGA<br>GAAG-3'    | 5'-<br>TGGTGGACTGGCAGCGGT<br>AG-3'      |
| LXR- $\alpha$  | 5'-<br>AACTGAAGCGGCAAGAAG<br>AGGAAC-3'  | 5'-<br>TGTGGCAGGACTTGAGG<br>AGGTG-3'    |

|                                                |                                        |                                        |                                    |
|------------------------------------------------|----------------------------------------|----------------------------------------|------------------------------------|
| LXR- $\beta$                                   | 5'-<br>GCGGCAGTTGGCACTAGAA<br>GG-3'    | 5'-<br>TGGTGTGGTAGGCTGAGG<br>TGTAAG-3' |                                    |
| HO-1                                           | 5'-<br>TATCGTGCTCGCATGAACA<br>CTCTG-3' | 5'-<br>GTTGAGCAGGAAGGCCGG<br>TCTTAG-3' |                                    |
| Collagen I                                     | 5'-<br>GCTCCTCTTAGGGGCCACT-<br>3'      | 5'-<br>CCACGTCTCACCATTGGG<br>G-3'      |                                    |
| Collagen IV                                    | 5'-<br>CTGGCACAAAAGGGACGA<br>G-3'      | 5'-<br>ACGTGGCCGAGAATTCA<br>CC-3'      |                                    |
| Fibronectin                                    | 5'-<br>ATGTGGACCCCTCCTGATA<br>GT-3'    | 5'-<br>GCCCAGTGATTCAGCAA<br>AGG-3'     |                                    |
| GAPDH                                          | 5'-<br>GTGGAGTCTACTGGCGTCT<br>T-3'     | 5'-<br>GCCTGCTTACCACCTTC<br>TT-3'      |                                    |
| PPAR- $\alpha$<br>promotor<br>(for<br>cut&tag) | Primer1                                | 5'-<br>CCTCCAGCCATTCTTGCTCA<br>-3'     | 5'-<br>CCTTGCACAGTGACCTGT<br>CT-3' |
|                                                | Primer2                                | 5'-<br>GGTAAGGAGATGTGCGCTG<br>A-3'     | 5'-<br>GGGCCTGCCACTATGCTA<br>TT-3' |
|                                                | Primer3                                | 5'-<br>CCTTCCCACCGACTGTTCTC<br>-3'     | 5'-<br>TCCGTTGGTAAACTGAGG<br>CG-3' |
