# Supplementary material
Source: PubMed Central journal article supplement (PMC8594318)
Supplement: NIHMS1750223-supplement-Supplement_S1.pdf [file NIHMS1750223-supplement-Supplement_S1.pdf]

## Supplemental Material

### Supplemental Figure Legends

#### **Supplemental Figure 1. The renal function and expression of CCKBR in Ang II-treated WT mice.**

WT (CCKBR<sup>+/+</sup>) mice were subcutaneously infused, via osmotic minipump, with saline vehicle (control, 2.64  $\mu$ L/d) or Ang II (1.44 mg/kg body weight/d) for 28 d. The kidney samples were collected at the end of 28 d.

**A and B:** Serum creatinine (A) and urinary albumin (B) were quantified. n=6; \*p<0.05 vs. Vehicle treatment.

**C:** Representative images of H&E staining and quantitative analysis of renal tubular injury, n=6. \*p<0.05 vs. Vehicle treatment.

**D:** Representative images of Masson's trichrome staining and quantitative analysis of renal interstitial fibrosis. n=6. \*p<0.05 vs. Vehicle treatment.

**E and F:** The mRNA (E) and protein (F) expressions of CCKBR were quantified in the kidneys from mice after 28 d of saline vehicle (control, 2.64  $\mu$ L/d) or Ang II (1.44 mg/kg body weight/d) infusion, n=6. \*p<0.05 vs. Vehicle-treatment.

**G:** Immunofluorescence analysis of CCKBR (red) and DAPI (blue) in the kidneys of mice after 28 d of saline vehicle (control, 2.64  $\mu$ L/d) or Ang II (1.44 mg/kg body weight/d) infusion. Representative images are on the left and bar graphs are on the right, n=6. \*p<0.05 vs. Vehicle treatment.

**Supplemental Figure 2. The effects of CCKBR deficiency on urinary albumin, systolic blood pressure, and number of glomeruli with Ang II treatment.**

WT (CCKBR<sup>+/+</sup>) and CCKBR<sup>-/-</sup> mice were subcutaneously infused, via osmotic minipump, with saline vehicle (control, 2.64  $\mu$ L/d) or Ang II (1.44 mg/kg body weight/d) for 28 d.

**A:** Representative images of urinary albumin bands stained by Coomassie brilliant blue with BSA as the standard (1, 2, 10  $\mu$ g) and quantitative analysis of urinary albumin, n=6. \*p<0.05 vs. WT+Vehicle treatment, #p<0.05 vs. WT+Ang II treatment.

**B:** Systolic blood pressure (SBP) of WT and CCKBR<sup>-/-</sup> mice infused with Ang II (1.44 mg/kg body weight/d) at 0, 3, 7, 14, 21, 28 d of infusion, n=6. \*p<0.05 vs. WT+Ang II treatment.

**C:** H&E staining of the kidneys of WT and CCKBR<sup>-/-</sup> mice infused with Ang II (performed 10 $\times$ ); the glomeruli are marked with arrows. The bar graphs show the quantitative analysis of number of glomeruli per area (10 $\times$ , 20 serial sections of the entire kidney), n=3. p=not significant.

**Supplemental Figure 3. The effects of CCKBR deficiency with Ang II+Gastrin-treatment.**

**A:** Representative images of H&E staining and quantitative analysis of renal tubular injury, n=6. \*p<0.05 vs. WT+Ang II+Gastrin treatment.

**B:** Representative images of Masson's trichrome staining and quantitative analysis of renal interstitial fibrosis, n=6. \*p<0.05 vs. WT+Ang II+Gastrin treatment.

**C:** Representative images of Sirius Red staining and quantitative analysis of Sirius Red-positive areas showing the renal collagen deposition, n=6. \* p<0.05 vs. WT+Ang II+Gastrin treatment.

**Supplemental Figure 4. The effect of gastrin on the systolic blood pressure in mice infused with Ang II and mice with UUO.**

**A:** Systolic blood pressure (SBP) was measured by tail-cuff method, in WT (CCKBR<sup>+/+</sup>) mice subcutaneously infused, via osmotic minipump, with saline vehicle (control, 2.64  $\mu$ L/d), Ang II (1.44 mg/kg body weight/d), and/or gastrin (120  $\mu$ g/kg body weight/d) at 0, 3, 7, 14, 21, 28 d of infusion, n=6. \* p<0.05 vs. others, #p<0.05 vs. Ang II treatment.

**B:** Schematic diagram of the experimental design. The mice with UUO were subcutaneously infused, via osmotic minipump with saline vehicle (control, 2.64  $\mu$ L/d) or gastrin (120  $\mu$ g/kg body weight/d) for 7 d. The kidneys were harvested 7 d after gastrin infusion.

**C:** Systolic blood pressure (SBP, measured by tail-cuff method) in UUO mice infused with saline vehicle control or gastrin, n=6. p=not significant.

**Supplemental Figure 5. The gating strategy for *in vivo* efferocytosis assay and the effect of gastrin on efferocytosis-associated genes *in vitro*.**

**A:** These figures show flow cytometry electronic gating strategy used to identify peritoneal macrophages that had engulfed BCECF AM-labeled apoptotic cells *in vivo*.

A1 shows the cells with normal morphology. A2 shows CD11b-positive-cells. A3 shows CD11b-positive cells with normal morphology. A4 shows F4/80-positive cells in CD11b-positive cells; these cells were considered as peritoneal macrophages. A5 shows FITC-positive cells in peritoneal macrophages. Because the apoptotic Jurkat cells were FITC-positive, the FITC-positive cells in peritoneal macrophages were considered as the macrophages that engulfed the apoptotic Jurkat cells.

**B:** RAW264.7 cells were incubated with gastrin ( $10^{-7}$  mol/L) or saline vehicle (control, 25 $\mu$ L) for 24 h, after which time the mRNA expression of efferocytosis-associated genes was measured, n=5. \* p<0.05 vs. Vehicle treatment.

**Supplemental Figure 6. The effect of gastrin treatment on the mRNA expression of PPAR- $\alpha$  and the effect of sh-PPAR- $\alpha$  on efferocytosis.**

**A:** RPT cells were incubated with gastrin ( $10^{-7}$  mol/L) or saline vehicle (control, 25  $\mu$ L) for 24 h, after which time PPAR- $\alpha$  mRNA was quantified by qRT-PCR, n=5. \*p<0.05 vs. Vehicle treatment.

**B:** The mRNA expression of PPAR- $\alpha$  was quantified in the kidneys from different groups of mice; all mice were WT (CCKBR<sup>+/+</sup>), unless indicated as CCKBR<sup>-/-</sup>. \*p<0.05 vs. Vehicle treatment, #p<0.05 vs. WT+Ang II treatment (WT=red open bar vs CCKBR<sup>-/-</sup>=blue open bar), &p<0.05 vs. UUO treatment.

**C:**The flow cytometry analysis shows the percentage of CD11b<sup>+</sup> (FITC) F4/80<sup>+</sup> (PE) macrophages (kidney-resident macrophages) in isolated kidney cells.

**D:** Kidney-resident macrophages were incubated with saline vehicle (control, 25  $\mu$ L),

CI988 ( $10^{-7}$  mol/L), gastrin ( $10^{-7}$  mol/L), or gastrin ( $10^{-7}$  mol/L)+CI988 ( $10^{-7}$  mol/L) for 24 h, prior to measuring PPAR- $\alpha$  mRNA, n=5. \*p<0.05 vs. others, #p<0.05 vs. Gastrin treatment.

**EandF:** RAW264.7(E) and RPT (F) cells were infected with lenti-shPPAR- $\alpha$  or control lentiviral particles (scramble shRNA transfected with lentiviral particles) for 72 h, after which time PPAR- $\alpha$  mRNA was quantified by qRT-PCR. The knockout efficiency was at least 70%, n=5. \*p<0.05 vs. Vehicle treatment.

**G:** Representative fluorescent images showing engulfment of apoptotic Jurkat cells (BCECF AM) by kidney-resident macrophages (Dil) (left panel). Kidney-resident macrophages were infected with lentivirus expressing PPAR- $\alpha$  shRNA or control (scramble) shRNA, and then treated with saline vehicle (control, 20  $\mu$ L) or gastrin ( $10^{-7}$  mol/L) for 24 h prior to measuring efferocytosis (phagocytosis) (right graph), n=4. \*p<0.05 vs. Vehicle treatment; #p<0.05 vs. Gastrin treatment.

### **Supplemental Figure 7. Original Western Blot images.**

**A:** Refer to Figure 4C.

**B:** Refer to Figure 4D.

**C:** Refer to Figure 4E.

**D:** Refer to Figure 4F.

**E:** Refer to Figure 4G.

**F:** Refer to Figure 4H.

**G:** Refer to Figure 5C.

**H:** Refer to Figure 5E.

**I:** Refer to Figure 6G.

**J and K:** Refer to Figure 7C.
